# Supplementary material for: The Temporal Relationships and Associations between Cutaneous Manifestations and Inflammatory Bowel Disease: A Nationwide Population-Based Cohort Study
Source: MDPI journal article supplement (doi:10.3390/jcm10061311), 2021-03-22
Supplement: s1 [file s1]

**Supplementary Table S1.** ICD-9-CM and ICD-10-CM codes of comorbidities.

| Comorbidity                            | ICD-9-CM                                                                                                                                         | ICD-10-CM                                                                                                                                                                                                                                         |
|----------------------------------------|--------------------------------------------------------------------------------------------------------------------------------------------------|---------------------------------------------------------------------------------------------------------------------------------------------------------------------------------------------------------------------------------------------------|
| Myocardial infarction                  | "410" "412"                                                                                                                                      | "I21" "I22" "I25.2"                                                                                                                                                                                                                               |
| Congestive heart failure               | "402.01" "402.11"<br>"402.91" "404.01"<br>"404.03" "404.11"<br>"404.13" "404.91"<br>"404.93" "429.3"<br>"425" "428"                              | "I43" "I50" "I11.0" "I13.0" "I13.2"<br>"I25.5" "I42.0" "I42.5" "I42.6"<br>"I42.7" "I42.8" "I42.9" "P29.0"                                                                                                                                         |
| Cerebrovascular disease                | "362.34" "437" "438"<br>"437.0" "437.1"<br>"437.9" "781.4"<br>"784.3" "997.0" "430"<br>"431" "432" "433"<br>"434" "435" "436"<br>"381.2" "384.2" | "G45" "G46" "I60" "I61" "I62" "I63"<br>"I64" "I65" "I66" "I67" "I68"<br>"H34.0" "H34.1" "H34.2"                                                                                                                                                   |
| Ankylosing spondylitis (AS)            | "720.0" "720.1"<br>"720.2" "720.8"<br>"720.9"                                                                                                    | "M45.0-M45.9"                                                                                                                                                                                                                                     |
| Rheumatoid arthritis (RA)              | "714"                                                                                                                                            | "M05" "M06"                                                                                                                                                                                                                                       |
| Autoimmune disease (without AS and RA) | "710.0" "710.1"<br>"710.2" "710.3"<br>"710.4" "710.5"<br>"710.8" "710.9"                                                                         | "M32" "M33" "M34" "M31.5"<br>"M35.1" "M35.3" "M36.0"                                                                                                                                                                                              |
| Liver disease                          | "571.2" "571.5"<br>"571.6" "571.8"<br>"571.9" "456.0"<br>"456.1" "456.2"<br>"572.2" "572.3"<br>"572.4"                                           | "B18" "K73" "K74" "K28" "K70.0"<br>"K70.1" "K70.2" "K70.3" "K70.9"<br>"K71.3" "K71.4" "K71.5" "K71.7"<br>"K76.0" "K76.2" "K76.3" "K76.4"<br>"K76.8" "K76.9" "Z94.4" "I85.0"<br>"I86.4" "K70.4" "K71.1" "K72.1"<br>"K72.9" "K76.5" "K76.6" "K76.7" |
| Diabetes mellitus                      | "250.0" "250.1"<br>"250.2" "250.3"<br>"250.4" "250.5"<br>"250.6" "250.7"<br>"250.8" "250.9"                                                      | "E08" "E09" "E10" "E11" "E13"                                                                                                                                                                                                                     |
| Renal disease                          | "585" "586" "V56"<br>"V42.0" "V45.1"                                                                                                             | "N19" "Z49" "I12.0" "I13.2"<br>"N18.5" "N18.6" "N25.0" "Z99.2"<br>"I13.11"                                                                                                                                                                        |
| Hypertension                           | "401" "402" "403"<br>"404" "405"                                                                                                                 | "I10" "I11" "I12" "I13" "I15"                                                                                                                                                                                                                     |
| Hyperlipidemia                         | "272.0" "272.1"<br>"272.2" "272.3"<br>"272.4"                                                                                                    | "E78"                                                                                                                                                                                                                                             |

**Supplementary Table S2.** ICD-9-CM and ICD-10-CM codes of skin diseases.

| <b>Skin disease</b>           | <b>ICD-9-CM</b>                | <b>ICD-10-CM</b>                                           |
|-------------------------------|--------------------------------|------------------------------------------------------------|
| Psoriasis                     | "696.1"                        | "L40.0" "L40.1" "L40.2" "L40.3"<br>"L40.4" "L40.8" "L40.9" |
| Vitiligo                      | "709.01"                       | "L80"                                                      |
| Atopic dermatitis             | "691.8"                        | "L20.9"                                                    |
| Polyarteritis nodosa          | "446.0"                        | "M30.0"                                                    |
| Erythema nodosum              | "695.2"                        | "L52"                                                      |
| Aphthous stomatitis           | "528.2"                        | "K12.0"                                                    |
| Pyoderma gangre-<br>nosum     | "686.01"                       | "L88"                                                      |
| Skin cancer                   | "173.0-173.9"<br>"172.0-172.9" | "C43.0-C43.9" "C44.0-C44.9"                                |
| Rosacea                       | "695.3"                        | "L71.0" "L71.1" "L71.8" "L71.9"                            |
| Hidradenitis suppu-<br>rativa | "705.83"                       | "L73.2"                                                    |
| Cutaneous T cell<br>lymphoma  | "202.83"                       | "C84.A3"                                                   |

**Supplementary Table S3.** Time (years) to develop skin diseases.

| <b>Skin disease</b>       | <b>No.</b> | <b>Mean (y)</b> | <b>SD (y)</b> | <b>Median (y)</b> | <b>Min (y)</b> | <b>Max (y)</b> |
|---------------------------|------------|-----------------|---------------|-------------------|----------------|----------------|
| Psoriasis                 | 20         | 5.05            | 3.68          | 4.34              | 0.25           | 12.72          |
| Atopic dermatitis         | 24         | 4.77            | 3.26          | 4.93              | 0.36           | 12.87          |
| Erythema nodosum          | 30         | 4.12            | 3.61          | 3.55              | 0.06           | 12.15          |
| Aphthous stomatitis       | 198        | 4.62            | 3.36          | 3.90              | 0.03           | 14.30          |
| Pyoderma gangrenosum      | 19         | 5.34            | 3.29          | 5.67              | 0.43           | 11.45          |
| Polyarteritis nodosa      | 9          | 3.90            | 3.19          | 3.15              | 0.28           | 9.17           |
| Rosacea                   | 61         | 5.55            | 3.43          | 5.35              | 0.41           | 13.77          |
| Hidradenitis suppurativa  | 9          | 5.59            | 4.08          | 4.89              | 0.64           | 13.86          |
| Cutaneous T cell lymphoma | 4          | 3.25            | 3.08          | 3.08              | 0.18           | 6.67           |

Abbreviation: SD, standard deviation; y, years; Min, minimum; Max, maximum.
